1  
2  
3  
4  
5  
6  
7  
8  
9  
10  
11  
12  
13  
14  
15  
16  
17  
18  
19  
20  
21  
22  
23  
24  
25  
26  
27  
28  
29  
30  
31

## Title Page

Expression of coffee florigen *CaFT1* reveals a sustained floral induction window associated with asynchronous flowering in tropical perennials

Carlos Henrique Cardon<sup>1,2</sup>; Raphael Ricon de Oliveira<sup>1</sup>, Victoria Lesy<sup>2</sup>; Thales Henrique Cherubino Ribeiro<sup>1</sup>; Catherine Fust<sup>2</sup>; Luísa Peloso Pereira<sup>1</sup>; Joseph Colasanti<sup>2\*</sup> and Antonio Chalfun-Junior<sup>1\*</sup>

\*Corresponding authors

<sup>1</sup> Laboratory of Plant Molecular Physiology, Plant Physiology Sector, Department of Biology, Federal University of Lavras (UFLA), Minas Gerais, Brazil.

<sup>2</sup> Department of Molecular and Cellular Biology, Department of Molecular and Cellular Biology, University of Guelph, Guelph, ON Canada.

Carlos Henrique Cardon – [cardon.chc@gmail.com](mailto:cardon.chc@gmail.com); Raphael Ricon de Oliveira – [rpharicon@gmail.com](mailto:rpharicon@gmail.com); Victoria Lesy – [vlesy@uoguelph.ca](mailto:vlesy@uoguelph.ca); Thales Henrique Cherubino Ribeiro – [thalescherubino@gmail.com](mailto:thalescherubino@gmail.com); Luísa Peloso Pereira – [luisapeloso@hotmail.com](mailto:luisapeloso@hotmail.com); Catherine Fust – [cfust@uoguelph.ca](mailto:cfust@uoguelph.ca); Joseph Colasanti – [jcolasan@uoguelph.ca](mailto:jcolasan@uoguelph.ca); Antonio Chalfun-Junior – [chalfunjunior@ufla.br](mailto:chalfunjunior@ufla.br)

Submission date: October 29, 2021; Number of tables: 0; Number of figures: 4; Word count: 5596; Supplementary data: Number of tables – 1 and Figures – 6.

## Running title

*CaFT1* is the *FLOWERING LOCUS T* ortholog in *Coffea* sp. L.

## Highlight

Coffee florigen CaFT1 and related regulators revealed an extended floral induction window clarifying the asynchronicity and influence of environment for flowering in tropical perennial crops, providing perspectives to its control.

## 32 **Abstract**

33

34 The behavior of florigen(s) and environment-influenced regulatory pathways that control  
35 flowering in tropical perennials with complex phenological cycles is poorly understood.  
36 Understanding the mechanisms underlying this process is important for food production in the  
37 face of climate change. To explore this, homologs of *Arabidopsis* florigen *FLOWERING LOCUS*  
38 *T* (*CaFT1*) and environment-related regulators *CONSTANS* (*CO*), *PHYTOCHROME*  
39 *INTERACTING FACTOR 4* (*PIF4*) and *FLOWERING LOCUS C* (*FLC*) were isolated from  
40 *Coffea* sp. L. (Rubiaceae). Overexpression of *CaFT1* in *Arabidopsis* showed typical early-  
41 flowering and yeast two hybrid studies indicated CaFT1 binding to bZIP floral regulator, FD,  
42 demonstrates that CaFT1 is a coffee orthologue of florigen. Expression of *CaFT1* and floral  
43 regulators were evaluated over one year using three contrasting genotypes: two *C. arabica* and  
44 one *C. canephora*. All genotypes showed active *CaFT1* transcription from February until  
45 October, indicating a potential window for floral induction. *CaCO* expression, as expected,  
46 varied over the day period and monthly with day length, whereas expression of temperature-  
47 responsive homologs, *CaFLC* and *CaPIF4*, did not correlate with temperature changes. Using  
48 coffee as a model, we suggest a continuum of floral induction that allows different starting points  
49 for floral activation, which explains developmental asynchronicity and prolonged anthesis events  
50 in tropical perennial species.

51

52 **Keywords** - Floral induction and development; *FLOWERING LOCUS T* (*FT*); Asynchronous  
53 flowering; *Coffea* sp. L. (Rubiaceae); Tropical perennial crops; Environment.

54

## 55 **Abbreviations**

56

57 BFT – BROTHER OF FT

58 CO – CONSTANS

59 FLC – FLOWERING LOCUS C

60 FM – Floral meristem

61 FT – FLOWERING LOCUS T

62 GA – Gibberellin

- 63 LD – Long day  
64 MFT – MOTHER OF FT  
65 PEBP - Phosphatidylethanolamine-binding protein  
66 PIF4 - PHYTOCHROME INTERACTING FACTOR 4  
67 SAM – Shoot apical meristem  
68 SFT – TWEEN SISTER OF FT  
69 SD – Short day  
70 TFL1 – TERMINAL FLOWER 1  
71 VM – Vegetative meristem

72  
73

## INTRODUCTION

74

75 In flowering plants, the transition of vegetative meristems (VMs) to a reproductive state  
76 is mainly controlled by members of the phosphatidylethanolamine-binding protein (PEBP)  
77 family that act as transcriptional coactivators (Cao *et al.*, 2016). The *Arabidopsis* *FLOWERING*  
78 *LOCUS T* (*FT*) gene is the first PEBP member identified to encode a florigen; that is, FT  
79 translocation via phloem from source leaves to VMs induces floral meristem (FM) production  
80 (Wigge *et al.*, 2005; Corbesier *et al.*, 2007). To ensure proper reproductive timing, the FT  
81 pathway integrates inductive exogenous stimuli, such as photoperiod, temperature, gibberellins  
82 (GA) and vernalization, together the endogenous autonomous pathway (Amasino, 2010; Song *et*  
83 *al.*, 2008; Kim *et al.*, 2009; Andrés and Coupland, 2012). The flowering process is very well  
84 explored in model plants such as *Arabidopsis*, however, it is poorly understood in perennial  
85 plants that have more complex reproductive cycles, such as *Coffea* sp. (Rubiaceae).

86 An example of this complexity is that perennial plants must maintain simultaneously in a  
87 branch the shoot apical meristem (SAM) in a vegetative state to guarantee the continuity of plant  
88 vegetative growth and reproduction in subsequent years, whereas older meristems at the base of  
89 branches form FMs and then flourish (Amasino, 2009; Albani and Coupland, 2010). Thus, this  
90 mode of reproduction is intrinsically connected with plant architecture indicating a precise  
91 molecular control to determine the different forms of meristems (Wang *et al.*, 2009; Albani and  
92 Coupland, 2010). The coffee phenological cycle is biennial, which means that it takes two years  
93 to produce fruits (Teketay, 1999; Camargo and Camargo, 2001). The first year is characterized

94 by the floral induction and floral development until anthesis (or bloom) which, in *Brazil*, occurs  
95 from January to March and in September, respectively (Camargo and Camargo, 2001;  
96 Majerowicz and Söndahl, 2005; Morais *et al.*, 2008). Importantly, the floral induction period is  
97 based on morphological observations, when vegetative and floral buds are distinguishable (de  
98 Oliveira *et al.*, 2014), but without precise molecular characterization of the inductive floral  
99 pathway (reviewed by López *et al.*, 2021 in press).

100 Organogenesis during coffee floral development was previously characterized  
101 (Majerowicz and Söndahl, 2005; de Oliveira *et al.*, 2014) and shown to be affected by  
102 environmental conditions that result in uneven development and sequential flowering (Camargo  
103 and Camargo, 2001; DaMatta and Ramalho, 2006; DaMatta *et al.*, 2007). For example, in the G4  
104 stage coffee buds enter a latent state during the cold and dry period of Brazilian winter in June to  
105 August (Wormer and Gituanja, 1970; Camargo and Camargo, 2001; Morais *et al.*, 2008). After  
106 this period, bud growth resumes in a quick passage from the G4 to G6 following the anthesis that  
107 coincides with the rain period around September. Thus, this suggests that coffee flowering is  
108 controlled by different factors, such as low temperatures and plant water potential (Crisosto *et*  
109 *al.*, 1992; Majerowicz and Söndahl, 2005; DaMatta and Ramalho, 2006), in addition to  
110 photoperiod, as commonly observed in angiosperms. Nevertheless, from the molecular point of  
111 view, the mechanism involved in the perception of these environmental stimuli and its  
112 relationship with the *FT*-dependent inductive pathway has never been explored in coffee.

113 The PEBP family of proteins can be divided into five subgroups defined by *Arabidopsis*  
114 family members: *FLOWERING LOCUS T (FT)*, *TWIN SISTER OF FT (TSF)*, *TERMINAL*  
115 *FLOWER 1 (TFL1)*, *BROTHER OF FT AND TFL (BFT)* and *MOTHER OF FT AND TFL*  
116 *(MFT)*. These phosphatidyl ethanolamine-binding protein (PEBP) genes have important roles in  
117 plant development, most notably floral induction and inflorescence architecture (Karlgrén *et al.*,  
118 2011; Zhu *et al.*, 2021). Accordingly, PEBP members are highly conserved between flowering  
119 species, especially *FT* and *TFL1* sequences (Turck *et al.*, 2008; Wickland and Hanzawa, 2015).  
120 Interestingly, *FT* and *TFL1* proteins are highly similar, yet they have opposite functions. That is,  
121 *FT* promotes floral meristem formation whereas *TFL1* represses flowering and maintains the  
122 inflorescence in an indeterminate state (Kaneko-Suzuki *et al.*, 2018; Nakamura *et al.*, 2019).  
123 These antagonistic roles are due *FT* and *TFL1* competition for the bZIP transcription factor *FD*  
124 and 14-3-3 proteins to create a floral activation complex (FAC) or a floral repression complex

125 (FRC), respectively (McGarry and Ayre, 2012; Kaneko-Suzuki *et al.*, 2018). Another difference  
126 is that FT protein accumulates in leaves and then moves long distances to the SAM (Yoo *et al.*,  
127 2013), whereas *TFL1* is expressed in a subdomain of the SAM (Bradley *et al.*, 1997).

128 In *Arabidopsis*, long-day (LD) induction of *FT* expression is largely dependent on the B-  
129 box transcription factor CONSTANS (CO), which is modulated by the circadian clock and day  
130 length (Amasino, 2010; Andrés and Coupland, 2012; Liu *et al.*, 2014). Under LD conditions, CO  
131 protein accumulates to a threshold sufficient to activate *FT* expression, whereas in short days  
132 (SD) CO is degraded via the 26S proteasome complex and does not activate *FT* expression  
133 (Suárez-López *et al.*, 2001; Valverde *et al.*, 2004; Zuo *et al.*, 2011). Other key transcription  
134 factors (TFs) regulating *FT* are PIF4 and FLC, both responsive to temperatures changes and  
135 activity depending on epigenetic changes in chromatin (Helliwell *et al.*, 2006; Kumar *et al.*,  
136 2012; Madrid *et al.*, 2021). PIF4 is responsive to warmer temperatures and positively regulates  
137 *FT* expression, whereas FLC is a repressor that is inactivated by prolonged cold periods  
138 (vernalization) allowing *FT* expression and flowering initiation (Michaels *et al.*, 2005; Amasino,  
139 2010). *FLC* homologs together with other MADS-box genes were described in *C. arabica* (de  
140 Oliveira *et al.*, 2010; 2014) and related to drought (Barreto *et al.*, 2012) that occurs in the cold  
141 period of the Brazilian winter. However, the interplay between the FT pathway and  
142 environmental signals through the identification and analysis of *CO*, *PIF4* and *FLC* and their  
143 roles in modulating floral induction is poorly understood in perennials and has never been  
144 explored in coffee.

145 In addition to environmental effects, another regulatory factor is sugar signaling, which  
146 plays an important role in plant development, including flowering regulation (Corbesier *et al.*,  
147 1998; Lastdrager *et al.*, 2014; Sheen, 2014). Day length directly affects sucrose and starch  
148 accumulation as a consequence of photosynthesis, which has been correlated with reproductive  
149 induction (Corbesier *et al.*, 1998). Accordingly, varying day length of different seasons is  
150 directly associated with the transition from vegetative to reproductive time in plants (reviewed  
151 by Andrés and Coupland, 2012). A possible role for sucrose as a signal for flowering is  
152 implicated by its influence on *FT* expression (Moghaddam and Van den Ende, 2013). Sucrose  
153 has been shown to act in leaves, downstream of *CO* and upstream to *FT*, to affect flowering  
154 (Corbesier *et al.*, 1998; Ohto *et al.*, 2001). Moreover, transcriptomic studies of maize floral  
155 regulator *indeterminate1 (id1)* shows a correlation between sugar and starch metabolism and

156 floral induction in this autonomously flowering plant (Coneva *et al.*, 2007, 2012; Minow *et al.*,  
157 2018).

158 Florigen and *FT* orthologs in diverse plant species are key integrators of reproductive  
159 meristem specification via interconnecting molecular pathways that determine the proper floral  
160 induction window (Amasino, 2009; He *et al.*, 2020). Despite conservation across plant species,  
161 variable expression patterns of *FT* homologs have been reported (Coelho *et al.*, 2014; Cao *et al.*,  
162 2016; Wolabu *et al.*, 2016; Štorchová *et al.*, 2019). This variable expression likely reflects the  
163 variety of flowering evolutionary strategies required to tailor flowering time and floral  
164 architecture diversification to particular geographical locations (Pin and Nilsson, 2012; Wickland  
165 and Hanzawa, 2015; Jin *et al.*, 2020). Very little research on the mechanisms underlying floral  
166 induction and its interplay with environmental-dependent pathways has been carried out in  
167 *Coffea* sp, a tropical perennial crop of considerable socio-economic importance (IOC, 2021).

168 Here we report the first characterization of homologs of the key floral regulators *FT*, *CO*,  
169 *PIF4*, and *FLC* from *C. arabica*, *C. canephora* and *C. eugenioides*. Through transgenic analysis  
170 and protein interaction assays we demonstrate that *CaFTI* from coffee is a functional floral  
171 inducer (an *FT* ortholog). To determine the precise floral induction window and establish a  
172 possible correlation with environmental signals, expression of *CaFTI* was determined during a  
173 year at two daily time points together with *FT* regulators *CaCO*, *CaPIF4*, and *CaFLC*.  
174 Expression was analysed in three coffee genotypes with contrasting flowering patterns, two *C.*  
175 *arabica* cvs. Acauã and IAPAR59 and *C. canephora* cv. Conilon, to examine related intra- and  
176 interspecific variation. In addition, to investigate a possible connection between sugar levels,  
177 gene expression and floral development, carbohydrate content was determined at the same time  
178 points for all genotypes. Based on these results we propose that an extended floral induction  
179 window for coffee could explain the asynchronous development and sequential flowering in this  
180 perennial species. Whereas *CaFTI* expression was correlated to short day photoperiod and cold  
181 (Brazilian winter), a similar pattern was not detected in the expression profiles of *CaCO*,  
182 *CaPIF4*, and *CaFLC*, indicating a more complex process regulating the flowering process. Thus,  
183 this work contributes to our understanding of the floral transition in perennial species and could  
184 support future strategies aimed at mitigating asynchronous flowering.

185  
186

## MATERIAL AND METHODS

187

## 188 **Plant material**

189

190 Plant material used for RNA extraction, cloning, gene expression, carbohydrate content  
191 (total soluble sugar, sucrose, reducer sugar, and starch) was obtained from 4-year-old coffee  
192 plants of three different cultivars established at the National Institute of Science and Technology  
193 (INCT-Cafe) experimental field at the Federal University of Lavras, Brazil (21°23'S, 44°97'W):  
194 *C. arabica* genotypes IAPAR 59 and Acauã, and *C. canephora* Conilon. All plants were  
195 cultivated under nutritional and pest control conditions recommended for coffee (Vieira, 2008).  
196 Three biological repetitions of each coffee cultivar were distributed randomly in the field. Each  
197 sampling consisted of a mix of three completely expanded leaves collected and immediately  
198 immersed in liquid nitrogen and stored at -80 °C until RNA extraction. Samples were collected  
199 at five-time points (December 2016, February, April, June, and October 2017) over a two-day  
200 period, at 6:00 am and 5:00 pm, considered the start and end of the day, totaling 90 samples.  
201 *Arabidopsis thaliana* var. Landsberg *erecta* (Ler) was used for *CaFTI* heterologous expression  
202 studies following Coelho *et al* (2014) plant growth conditions. Plants were grown in growth  
203 chambers under 16 hrs light / 8 hrs dark at 22 °C and 60 % humidity.

204

## 205 ***In silico* and phylogenetic analysis**

206

207 Searches for coffee homologs of *FLOWERING LOCUS T* (*FT*), *CONSTANS* (*CO*), and  
208 *PHYTOCHROME INTERACTING FACTOR 4* (*PIF4*) were performed by sequence comparisons  
209 using the BLAST tool (Johnson *et al.*, 2008). First, the described genes *FT* (At1G65480), *CO*  
210 (At5G15840), and *PIF4* (At2G43010), and *FLC* (At5g10140) from *A. thaliana* were used as  
211 queries (Lamesch *et al.*, 2012) against the *C. arabica* (NCBI:txid13443) annotated genome  
212 deposited at the National Center for Biotechnology Information (NCBI) and the Coffee Genome  
213 Hub (Denoëud *et al.*, 2014). To enrich searches for new coffee sequences phylogenetic analysis  
214 also was performed with different homologs from various species, including *Arabidopsis*  
215 *thaliana*, *Solanum lycopersicum*, *Brassica napus*, *Jatropha curcas*, *Nicotiana tabacum*, *Glycine*  
216 *max*, *Oryza sativa*, *Zea mays*, *Sorghum bicolor*, *Solanum tuberosum* and *Populus nigra*. The  
217 sequence for coffee *FLC*, *CaFLC*, was retrieved from the previously reported sequence (de

218 Oliveira *et al.*, 2010).

219 Putative homologous sequences (>80% similarity and e-Value < 0,005) were aligned by  
220 ClustalX2 (Larkin *et al.*, 2007), analyzed by Genedoc software (Nicholas and Nicholas, 1997),  
221 and with the translated nucleotide sequence to protein, phylogeny was inferred with the nearest  
222 neighbour joining method in MEGA-X (Kumar *et al.*, 2018). Duplicate sequences were deleted  
223 from the first phylogenetic tree and only considered *A. thaliana* and *S. lycopersicum* sequences  
224 for the final tree (Fig. S1). The IDs of the used sequences are presented in the legend of Fig. S1.  
225 To provide further evidence of the putative coffee FT as a floral inducer, key amino acids were  
226 identified in alignment with CETS members from *A. thaliana* and *S. lycopersicum* (Fig. S2). The  
227 conserved amino acids that distinguish the related proteins FT and TFL1, a floral inducer and a  
228 repressor respectively (Ahn *et al.*, 2006; Wickland and Hanzawa, 2015; Jung *et al.*, 2016), are  
229 shown in Fig. S2. Similar analyses were made to show the conserved amino acids between  
230 coffee proteins and homologs of CO and PIF4 (Fig. S3 and S4).

231

## 232 **Gene cloning**

233

234 Total RNA from coffee leaves was isolated using Concert™ Plant RNA Reagent  
235 (Invitrogen) following the manufacture's recommendation. RNA concentration and purity were  
236 measured by spectrophotometric analysis (*GE NanoVue*™ Spectrophotometer). All samples  
237 were treated with Ambion DNase I (RNase-free) kit (Thermo Fisher) and cDNA synthesized  
238 using High-Capacity cDNA Reverse Transcriptase Kit (Thermo Fisher) following the  
239 manufacturer's recommendation. Primers were designed for gene isolation with the putative  
240 *CaFTI* sequence previously identified by *in silico* analysis and including the restriction sites  
241 *SpeI* in the forward primer and *BsrGI* in the reverse (5'Fw = ATGCCTAGAGGGGGAGGAGA;  
242 5'Rv = TTATCGTCTTCTGCCTC). The Polymerase Chain Reaction (PCR) was carried out  
243 using *iProof* High-Fidelity DNA Polymerase (Bio-Rad) following the manufacture's protocol.  
244 PCR fragments were isolated from 1 % agarose gel after electrophoresis and purified by  
245 *GeneJET Gel Extraction Kit* (Thermo Fisher). The fragment generated was inserted into the  
246 PJET1.2/blunt cloning vector (Thermo Fisher) and transferred to pK2WG7 plasmid (Thermo  
247 Fisher), both previously digested using restriction enzymes, and then ligated with T4 DNA ligase  
248 (New England Biolabs – NEB). All procedures followed the manufacturer's instructions.



249

## 250 **Plant transformation**

251

252 *Arabidopsis* var. *Landsberg erecta* (*Ler*) wild type plants (WT) and *ft* loss-of-function  
253 mutants were transformed to overexpress *CaFTI* using the *Agrobacterium tumefaciens* strain  
254 GV3101::pMP90 and floral dip protocol (Clough and Bent, 1998), using the isolated and cloned  
255 *CaFTI* fragment under the control of the CaMV 35S promoter (Gene cloning above section).  
256 Seeds from different transformation events were harvested separately for each background  
257 genotype. Positive transformed seeds were screened in selective growth media with Kanamycin  
258 30 ug/mL and, after 2 days of incubation in darkness and at 4 °C, they were maintained in a  
259 growth chamber under continuous light for one week. Twenty positive T1 plants were transferred  
260 to soil and after two weeks, DNA was extracted from leaves and PCR analysis was conducted to  
261 confirm insertions. Overexpression of *CaFTI* driven by 35S CaMV was analyzed in 9  
262 independent lines from 24 in T2 both *Ler* wild type (*Ler*-WT) plants as well as *ft* mutants.

263

## 264 **Yeast two Hybrid assay**

265

266 Protein-protein interaction analysis by Yeast Two Hybrid assay with CaFT against AtFD  
267 and At14-3-3 was performed with the Matchmaker Gold Yeast Two-Hybrid System (Chien *et*  
268 *al.*, 1991). The *CaFTI* sequence was amplified by *iProof* High-Fidelity DNA Polymerase (Bio-  
269 Rad) with restriction enzyme site tag insertion (Fw-*EcoRI* and Rv-*BamHI*), inserted to pBridge  
270 plasmid by T4 DNA ligase and transformed in DH5α *E. coli* competent cells. Gold Yeast was  
271 transformed with *CaFTI*-pBridge (Bait) and *AtFD*-pGADT7-RecAB (Prey); and *CaFTI*-pBridge  
272 (Bait) and *At14-3-3*-pGADT7-RecAB (Pry). AtFD and At14-3-3 were screened from  
273 *Arabidopsis* GoldY2H library.

274

## 275 **Gene expression analysis (RT-qPCR)**

276

277 The primers for Reverse Transcription quantitative Polymerase Chain Reaction (RT-  
278 qPCR), shown in Table S1, were designed using as template the *CaFTI*, *CaCO* and *CaPIF4*  
279 sequences identified in this work by *in-silico* analysis, whereas for *CaFLC*, the sequence was

280 previously characterized by de Oliveira *et al.* (2010). Primers were designed following  
281 specifications for standard qPCR such as amplicon length (between 80 and 150 bases), having no  
282 sequences at the conserved domain, 40% to 60% GC content, and others as suggested by MIQE  
283 (Bustin *et al.*, 2009) and examined for hairpins and dimers with the Oligoanalyzer Tool IDT  
284 (<https://www.idtdna.com/pages/tools/oligoanalyzer>). The genes *CaUBQ2* and *CaMDH* and their  
285 described primers were used as reference genes (Martins *et al.*, 2017). RNA extraction, DNase  
286 treatment, and reverse transcription reaction were performed as described above (Gene cloning  
287 session). RT-qPCR analysis was performed using 15 ng of cDNA to a final volume of 15  $\mu$ L  
288 reaction with Rotor-Gene SYBR® Green PCR Kit (Qiagen), in a Rotor Gene-Q (R)  
289 thermocycler (Venlo, Netherlands). Mix reagents: 7.5  $\mu$ L of SYBR-green (QuantiFast SYBR  
290 Green PCR Kit - Qiagen), 3.0  $\mu$ L of forward and reverse gene-specific primers, 1.5  $\mu$ L of cDNA  
291 at 10 ng/ $\mu$ L, and 3  $\mu$ L of RNase-DNase-free water, resulting in at 15  $\mu$ L final volume. Three  
292 biological repetitions were used, run in duplicate, and amplification was performed following  
293 manufacturer's instructions. Relative expression differences were calculated by log<sub>2</sub> of fold  
294 change and statistical analysis by Linear Mixed Model as described by Steibel *et al.* (2009).

295

### 296 **Carbohydrate Content Analysis**

297

298 Carbohydrate quantification was carried out following methods adapted by Meireles da  
299 Silva *et al.* (2014) with modifications: 100 mg of fresh frozen tissue previously powdered with  
300 liquid nitrogen were homogenized in 5 mL potassium buffer (100 mM, pH 7.0) followed by 30  
301 min incubation in a water bath at 40 °C. Supernatant was collected after 10 min centrifugation at  
302 10,000 xG and stored at -20 °C. Pellets were used for starch extraction by 5 mL potassium  
303 acetate buffer (200 mM, pH 4.8) resuspended with 16 units of amyloglucosidase enzyme,  
304 followed by two hours at 40 °C and 20 min of centrifuge at 10,000 xG for supernatant separation  
305 and starch quantification. Starch, sucrose, and total soluble sugars were quantified according to  
306 Dische (1962) and, reducing sugar levels according to Miller (1959).

307

### 308 **Statistical analysis**

309

310 A Linear Mixed Model was used for statistical analysis of biochemistry quantification by

311 the lme4 R package (Bates *et al.*, 2015), and adjustment parameters following Oliveira *et al.*,  
312 (2020) statistical methods. RT-qPCR statistical analysis was carried out by log<sub>2</sub> of fold change  
313 by Linear Mixed Model as described by Steibel *et al.* (2009).

314  
315

## RESULTS

316

### 317 Identification of *FT*, *CO* and *PIF4* homologs from *Coffea* sp.

318

319 To identify *FT* sequences and other genes related to floral regulatory pathways, such as  
320 *CO* and *PIF4*, we searched for homologous genes in *C. arabica* (NCBI:txid13443) and *C.*  
321 *canephora* (<https://coffee-genome.org/>) genome databases. Through phylogenetic analysis,  
322 sequences were compared to their homologs in other species to identify the most similar  
323 counterparts as putative orthologs (**Fig. S1**). Genome analysis of homologous sequences  
324 identified seven *FT*-like genes, four *CO*-like genes and four *PIF4*-like genes. The PEBP family  
325 members, which include FT-like (**Fig. S1-A**), were separated into three subgroups based on  
326 previous reports: *FT-LIKE* (*FT* and *TSF*), *TFL1-like* (*TFL1* and *BFT*) and *MFT-like* (*MFT*)  
327 (Karlgrén *et al.*, 2011; Nasim *et al.*, 2017).

328 Sequence alignments of PEBP homologs, including those from *Arabidopsis thaliana* and  
329 *Solanum lycopersicum* (**Fig. S2**), revealed conserved amino acids in *Coffea* sequences related to  
330 FT-like floral inducers. For example, the conserved Y85 amino acid residue reported to be a  
331 hallmark of FT orthologs supports the identified coffee genes as a possible florigen (Hanzawa *et*  
332 *al.*, 2005). These FT-like sequences used in further functional characterization were identical in  
333 *C. arabica* and *C. canephora* and here both are referred to as *CaFTI*. Similar genomic analysis  
334 was undertaken for CO-like (**Fig. S3**) and PIF4-like genes (**Fig. S4**), which showed conserved  
335 motifs indicating they are putative *Coffea* sp. orthologs.

336

### 337 Overexpression of *CaFTI* in *Arabidopsis* and protein interaction analysis suggest that it is a 338 *Coffea* sp. *FT* ortholog

339

340 We explored *CaFTI* function by over-expressing this gene in *Arabidopsis thaliana*  
341 Landsberg *erecta* (*Ler*) to examine the effects on flowering. In addition, yeast two hybrid (Y2H)

342 assays were performed to test conserved protein-protein interactions between CaFT1 and  
343 components of the Arabidopsis floral regulatory complexes. In 24 independent lines from T2  
344 generations of *CaFT1* overexpression driven by the 35S CaMV promoter, nine independent lines  
345 caused a strong early flowering phenotype in both *Ler* wild type (*Ler*-WT) plants as well as *ft*  
346 mutants. Transgenic plants flowered 12 days after germination (DAG) in contrast to *Ler*-WT  
347 plants, which flowered at 28 days (**Fig. 1A**). Accelerated transition from vegetative to  
348 reproductive development was also indicated by the reduced number of rosette leaves initiated in  
349 both *Ler*-WT and *ft* mutant backgrounds (**Fig. 1B**).

350 Known conserved components of the *Arabidopsis* Floral Activation Complex (FAC)  
351 include FT and FD together with a 14-3-3 protein (Kaneko-Suzuki *et al.*, 2018). Y2H assays with  
352 CaFT1 were carried out to test whether it interacts with AtFD and a 14-3-3 protein. CaFT1  
353 protein was shown to interact with AtFD (**Fig. 1C**) as expected, since both proteins are reported  
354 as partners to form a protein complex (Abe *et al.*, 2005; Wigge *et al.*, 2005; Corbesier *et al.*,  
355 2007; Jung *et al.*, 2016). However, despite the 14-3-3 protein being a component of the FAC  
356 with FT and FD proteins, no interaction was detected between CaFT1 and At14-3-3, suggesting  
357 diversification on 14-3-3 homologs and/or components of the FAC in *Coffea* sp. Together these  
358 results strongly support a role for CaFT1 as a floral inducer and that the selected *CaFT1* gene is a  
359 functional FT ortholog in *Coffea* sp.

360

### 361 ***CaFT1*, *CaFLC*, *CaCO*, *CaPIF4* show variable expression patterns over the course of a year**

362 Cultivars of the same perennial species can show differential floral development patterns,  
363 especially flowering time (reviewed by Lopez *et al.*, 2021 in press). Such variation between  
364 cultivars is important for breeding programs to derive different cultivar genotypes with  
365 contrasting floral development times (Carvalho, 2008). Relevant to this study, variable flowering  
366 patterns were observed for the *C. arabica* cvs. Iapar 59, Acauã and *C. canephora* cv. Conilon  
367 cultivars (**Fig. S5**). To determine the floral induction window and explore a possible intra- and  
368 inter-specific diversification of *CaFT1* related to the contrasting flowering patterns of coffee  
369 cultivars, the expression of *CaFT1* in leaves of these genotypes were examined by RT-qPCR  
370 over the course of a year (**Fig. 2**).

371 Despite quantitative differences, all coffee genotypes showed a clear “bell shaped”  
372 pattern of *CaFT1* expression during the year for both morning and afternoon samples. *CaFT1*

373 expression was observed in leaf samples from February, and increased progressively to  
374 maximum expression in June, followed by drastically reduced transcript levels in October and  
375 December (**Fig. 2A**). This result was correlated with the precise floral induction window,  
376 extending and encompassing the described emergence of floral buds (Majerowicz and Söndahl,  
377 2005; de Oliveira *et al.*, 2014). Comparing genotypes, *C. arabica* cv. Iapar 59 and *C. canephora*  
378 showed similar values for *CaFTI* expression throughout the year and independent of the time  
379 period, whereas *C. arabica* cv. Acauã showed lowest expression levels in February and highest  
380 in April and June (**Fig. 2A**). This result can be associated with phenotypic differences between  
381 early- and late flowering coffee cultivars (**Fig. S5**).

382 Moreover, *FT* and florigen genes from diverse plant species have been shown to act as a  
383 hub for floral meristem activation by integrating different interconnected pathways responsive to  
384 environmental signals (Amasino, 2010; Andrés and Coupland, 2012). Thus, to gain insights into  
385 the regulation of *CaFTI*, the co-expression expression of photoperiod and thermosensitive FT  
386 regulators, as *CaCO*, *CaFLC* and *CaPIF4* (**Figs. S1 to S4**) were also determined at the same  
387 time points (**Fig. 2B, 2C and 2D**). Expression analysis showed that *CaFTI* transcription is  
388 detected first in leaves collected in February and increases gradually until it reaches a maximum  
389 in June. This period coincides with the shorter day length photoperiod and colder temperatures,  
390 typical of the winter in coffee-growing regions of Brazil (**Fig. 4A and S6**).

391 For all coffee genotypes, expression of *CaCO* was higher in the morning compared to  
392 afternoon (**Fig. 2B**), in agreement with the photoperiod-dependent regulation of *CO* orthologs  
393 reported in other plants (Suárez-López *et al.*, 2001; Zuo *et al.*, 2011). In the morning, *CaCO*  
394 expression presents a “smile shape” (or inverted bell shape) pattern throughout the year and was  
395 quite similar among genotypes, which means higher values in December and October and lower  
396 in the middle timepoints. This result correlates with the photoperiod of longer day length (**Fig.**  
397 **4A and S6-A**). In afternoon samples, *CaCO* expression was lower and stable with few  
398 differences observed for genotypes, except in April and October. Comparing genotypes, in the  
399 morning *CaCO* was expressed at lower levels in cv. Conilon than *C. arabica* both cvs. for all  
400 time points throughout the year.

401 Regarding thermosensitive FT regulators, expression of *CaFLC* and *CaPIF4* was  
402 detected in all months for all three coffee genotypes, with few differences during the year in the  
403 morning, but varying in the afternoon (**Fig. 2C and 2D**). In the afternoon, *CaFLC* expression

404 presents different patterns and maximum levels depending on genotype, for *C. arabica* cv. Iapar  
405 59 it is in December and cv. Acauã in April and *C. canephora* cv. Conilon June. In the morning,  
406 no significant differences were found for *CaFLC* expression between *C. arabica* genotypes  
407 while cv. Conilon were always expressed less. Similar to *CaFLC*, *CaPIF4* expression in leaves  
408 showed little variation throughout the year, and no expression differences between coffee  
409 genotypes were observed during the day or throughout the year, except for cv. Acauã in October  
410 **(Fig. 2D)**.

411 The *CaFLC* and *CaPIF4* expression did not vary with the temperature changes in Brazil  
412 **(Fig. 4A and S6-B)**, with the lowest values in June and highest in October and December,  
413 except for *CaFLC* in June and afternoon for cv. Conilon. Moreover, and importantly, *CaFLC* and  
414 *CaPIF4* expression did not correlate with the expression pattern of *CaFTI* since it is expressed at  
415 higher levels in June when the putative negative regulator *CaFLC* is expressed and *CaPIF4* did  
416 not change. In addition, no differences or expression correlations were found for precipitation  
417 and humidity **(Fig. S6-C and D)**. Thus, these results suggest that the floral inductive *CaFTI*  
418 pathway is not influenced, or at least to a lesser extent, by these thermosensitive floral FT  
419 regulators.

420

#### 421 **Analysis of carbohydrate content in coffee leaves shows correlation with *CaFTI* expression**

422

423 Sugars provide energy to all metabolic processes in plants and, with respect to the  
424 preparation for reproductive development, possibly expression of florigens such as *FT* as well  
425 (Corbesier *et al.*, 1998; Ohto *et al.*, 2001; Cho *et al.*, 2018). To examine a possible correlation  
426 with the *CaFTI* expression pattern and the energy status of coffee leaves, the carbohydrate  
427 content (total soluble sugar, sucrose, reducing sugar and starch) in adult plants was quantified at  
428 two daily timepoints over the course of a year.

429 Sucrose, starch, total soluble sugar and reducing sugars were quantified from the same  
430 samples used for expression analysis **(Fig. 2)**. Results show patterns of distribution for the  
431 different coffee genotypes **(Fig. 3)**. In general, all genotypes showed higher values for Total  
432 Soluble sugars (TS) and Sucrose (SC) in December and April **(Figs. 3A and B)**, the summer  
433 period in Brazil, which is hotter and has more hours of daylight **(Figs. 4A, S6-A and B)**. Similar  
434 results were observed for sucrose, but it was noted that cv. Iapar 59 had higher levels in all

435 months (**Fig. 3B**). For reducing sugars (Fig. 3C), all genotypes had similar levels throughout the  
436 year, with *C. arabica* cv. Acauã showing higher values at all timepoints, except April. Finally,  
437 the quantification of starch levels showed a contrasting pattern between coffee genotypes. For  
438 example, the cv. Iapar 59 and cv. Conilon showed a clear pattern of increasing values from  
439 December to October in the next year, differing only at the highest timepoints, June and April,  
440 respectively. Whereas the cv. Acauã showed lower starch levels overall compared to other  
441 genotypes and the highest levels in October (**Fig. 3D**).

442 These findings showed different patterns among the three coffee genotypes that could be  
443 related to differences observed for *CaFTI* expression (**Fig. 2A**) and, consequently, flowering  
444 time (**Fig. S5**). Thus, sucrose and other soluble sugars were the only types analysed whose levels  
445 correlated with the period of higher *CaFTI* expression, in April and June (Fig. 2A). Since  
446 sucrose is the main transport sugar (Lemoine, 2000) it is possible that *CaFTI* expression could  
447 be responsive to the sugar state. Similarly, a correlation between the energy status and flowering,  
448 as well as *FT* expression with trehalose-6-phosphate was established in *Arabidopsis* (Wahl *et al.*,  
449 2013; Fichtner *et al.*, 2021).

450  
451

## DISCUSSION

452

453 ***CaFTI* function and expression revealed the floral induction window in coffee that could be**  
454 **associated with the asynchronous flowering in perennial species**

455

456 Previous studies focused on understanding the transition from juvenile to reproductive  
457 phase in perennial species have demonstrated that *FT*-related genes are involved in floral  
458 induction and dormancy time in response to seasonal stimuli in trees (Böhlenius *et al.*, 2006).  
459 However, the link between regulatory pathways of floral activation and asynchronous flowering  
460 is still poorly understood. First, in this work we demonstrate that overexpressing *CaFTI* in  
461 *Arabidopsis*, wild type and *ft-1* mutants, causes the typical early flowering phenotype and that  
462 *CaFTI* interacts with AtFD (**Fig. 1**), a component of the floral activation complex (Kaneko-  
463 Suzuki *et al.*, 2018). Similar results were found for other annual or perennial plants when *FT*  
464 homologs were overexpressed in *Arabidopsis* and/or also in their respective species; for  
465 example, Poplar and apple (Kotoda *et al.*, 2010; Tränkner *et al.*, 2010), tomato (Cao *et al.*, 2016),

466 *Eucalyptus* (Klocko *et al.*, 2016), *Medicago* (Laurie *et al.*, 2011) and blueberry (Gao *et al.*,  
467 2016). Thus, CaFT1 can act as a florigen in *Arabidopsis* strongly suggesting same function in  
468 coffee plants as observed in other perennials. Further studies demonstrating that CaFT1 can act  
469 as a florigen in *Coffea* sp. will need to overcome the difficulty of transforming this species  
470 (Ribas *et al.*, 2011).

471 In coffee, the meristem floral transition window is reported to occur from January to  
472 March (Camargo and Camargo, 2001; Majerowicz and Söndahl, 2005). To understand the  
473 molecular events occurring at this transition, here we characterize an FT homolog from coffee  
474 that acts as a florigen and show that it is transcriptionally active for a longer period than the  
475 previously described window (Fig. 2A). *CaFT1* expression extends from February to October,  
476 reaching a maximum in June, which is a more precise characterization to indicate the potential  
477 floral induction window. Such a window overlaps with the entire period of floral bud  
478 development, which was interpreted as a continuum of induction (Fig. 4B). This extended  
479 window explains the formation of floral buds at the base of branches (older buds) together with  
480 induction of newly formed buds from the SAM at the distal end of branches (Fig. 4C). Floral bud  
481 development starts at different times until anthesis in September, when *CaFT1* expression  
482 decreases rapidly, followed by vegetative growth of new branches, restarting the cycle (**Fig. 4B**  
483 **and C**). Moreover, our finding suggests that the developmental time is also different, or, in other  
484 words, floral meristems induced early (at the base of the branch) develop slower than later ones  
485 (those closer to SAM). Thus, the *CaFT1* expression patterns observed in this study suggest that  
486 the prolonged expression window is associated with the asynchronous flowering behavior of  
487 coffee (**Fig. 4B and C**). Moreover, due to the conserved nature of flowering mechanisms, we  
488 speculate that this occurs in other tropical perennials plants.

489 In addition, the *CaFT1* expression pattern in coffee supports evidence that floral  
490 induction occurs only in axillary meristems because the FT from the leaves is distributed along  
491 the branch controlling floral induction to proximal meristems (McGarry and Ayre 2012). This  
492 also may explain the asynchronous flowering behavior of *Coffea* sp L., in which floral bud  
493 development occurs at axillary meristems from branches formed at different times and does not  
494 produce terminal flowers from the SAM (**Fig. 4C**). Alternatively, from the expression results  
495 (**Fig. 2 and 4B**), it is possible that *CaFT1* other functions in addition to floral induction, since it  
496 is reported to have a role in a wide range of developmental processes such as fruit set, vegetative



497 growth, stomatal control and tuberization (Pin and Nilsson, 2012). Further study is required to  
498 explore this possibility.

499

## 500 **Coffee floral transition and photoperiodic stimulus**

501

502 Despite the extended window of *CaFTI* expression, it is clear from the analysis with  
503 three genotypes that there is a conservation of the maximum level in June (Fig. 2), raising the  
504 question of whether there is a correlation with environmental cues during the period (Fig. 4). The  
505 florigen encoded by *FT* and its orthologs from numerous plants has been shown to induce the  
506 floral transition in response to temperature and photoperiod (Tsuji, 2017). With the isolation of  
507 an *FT* orthologue in coffee, this analysis can be extended to floral induction in tropical species  
508 that are subjected to high temperatures throughout the year. The expression profile of *CaFTI*  
509 (**Fig. 2A**) may show less variation with respect to photoperiod effects, possibly because there is  
510 less daylight variation in equatorial regions compared to temperate zones.

511 Examination of flowering control in trees provides evidence that CONSTANS (CO)  
512 protein is responsible for *FT* ortholog expression induction by its accumulation in long days  
513 (LD) (Böhlenius *et al.*, 2006). However, despite *CaCO* showing expression variation in response  
514 to day length (**Fig 2B**), its expression over the course of the year showed an inverse relationship.  
515 The *CaCO* showed a variable expression pattern for all three coffee genotypes with higher values  
516 reached in the morning, according to the circadian clock that is mainly responsive to photoperiod  
517 (Valverde *et al.*, 2004). Comparing expression over the year, *CaCO* was higher in December and  
518 October (**Fig. 2B**), coinciding with summer in the Southern hemisphere and the period of  
519 greatest solar light incidence (**Fig. 4 and S6-A**). This was opposite to the pattern since *CaFTI*  
520 expression is higher during the Brazilian winter (Fig. 2A), with the shortest day length (**Fig. 4A**  
521 **and S6-A**) and more highly expressed in summer in December and October (**Fig. 2A**). Other  
522 factors might be involved in the CO regulatory pathway of *CaFTI* expression; for example,  
523 Wenkel, *et al.*, (2006) showed that the protein HEME ACTIVATOR PROTEIN2 (HAP2) or  
524 HAP3 can create a complex with CO that causes a reduction in the expression of *FT*.

525

526 **Expression of *CaFTI* is not correlated with *CaFLC* and *CaPIF4* expression, suggesting**  
527 **alternative thermoregulatory pathways that are not influenced by temperature**

528

529           In regions where temperatures vary during the year, floral initiation and dormancy for  
530 some species can be controlled by cold exposure or vernalization (Michaels *et al.*, 2005; Kim *et*  
531 *al.*, 2009; Madrid *et al.*, 2021). In the *Arabidopsis* vernalization pathway, *FLC* expression is  
532 repressed after prolonged exposure to colder temperatures, thus activating *FT* expression and  
533 allowing floral meristem induction (Michaels and Amasino, 1999; Helliwell *et al.*, 2006; Aikawa  
534 *et al.*, 2010). On the other hand, *PIF4* is responsive to warmer temperatures and positively  
535 regulates *FT* expression (Kumar *et al.*, 2012). Thus, we hypothesized that *FLC* and *PIF4*  
536 homologs in coffee could be related to thermal-sensitive pathways, possibly regulating *CaFTI*  
537 expression. Here we use them as a probe to evaluate co-expression patterns that are integrated  
538 with temperature changes during the growing season.

539           In this work, *FLC* homologs were found in coffee, which is interesting given that it is a  
540 tropical plant that does not normally experience freezing temperatures. In line with this, *CaFLC*  
541 expression was not associated with temperature variation, as might be expected. A similar result  
542 was found for *CaPIF4* expression (Fig. 2C and D, Fig. 4A and S6-A). Over the course of the  
543 experiment, when the lowest temperatures were registered in June and the highest occurred in  
544 December, *CaFLC* and *CaPIF4* showed stable expression patterns or changes in different  
545 periods not correlated with these temperature changes. Moreover, comparing *CaFTI* and *CaFLC*  
546 expression patterns, there was no inverse co-expression correlation as would be expected if *FLC*  
547 repressed *FT* activity, nor was there a positive correlation with *CaPIF4*, suggesting it is not an  
548 *FT* inducer. Overall, expression of *CaFTI* was highest in June, during the Brazilian winter (Fig.  
549 2A, Fig. 4A and S6-A), suggesting positive regulation by cold or even drought, typical  
550 characteristics of the Brazilian winter. Further analysis under controlled conditions will  
551 demonstrate whether *CaFTI* is responsive to cold and/or drought. In addition, *CaFLC* expression  
552 varied between coffee genotypes, with Iapar 59 and Acauã showing similar expression, whereas  
553 Conilon showed lower expression levels throughout the growth period and higher in afternoon  
554 samples of June (Fig. 2C). These differential expression patterns suggest intra- and inter-specific  
555 transcriptional differences, which might coincide with contrasting flowering behavior (DaMatta  
556 and Ramalho, 2006), or it could be associated with greater phenotypic homeostasis of the  
557 allotetraploid *C. arabica* than its diploid parents in response to different temperature conditions  
558 (Bertrand *et al.*, 2015).

559           These results show no evidence that the *FT*-dependent floral transition pathway is  
560 regulated by coffee *FLC* or *PIF4* homologs, thus the potential roles of *CaFLC* and *CaPIF4* in  
561 flowering of tropical perennials awaits further study. Alternatively, despite tropical species such  
562 *Coffea* sp. having sequences that are homologous to *Arabidopsis FLC* and *PIF4*, they may have  
563 functions not necessarily related to floral control in response to temperature variation. The  
564 finding that *CaFLC* expression varied widely in different coffee tissues such as, roots, leaf, SAM  
565 at all floral and fruit developmental stages (de Oliveira *et al.*, 2014) suggests functions other than  
566 flowering repression, such as coordinating organogenesis together with *SOC1* as reported in  
567 *Arabidopsis* (Deng *et al.*, 2011). In support of a possible role in organogenesis, *CaFLC*  
568 expression is upregulated in response to drought (Barreto *et al.*, 2012), which coincides with the  
569 growth latency in the G4 stage interpreted as a dormant stage (Wormer and Gituanja 1970;  
570 Majerowicz and Söndahl, 2005). At present, however, no direct mechanism for this has been  
571 described yet (reviewed by Lopez *et al.*, 2021 in press).

572           Future research will decipher whether *CaFLC* and *CaPIF4* are involved in flowering, and  
573 their relationship with environmental signals and the *FT*-regulatory pathways. In addition, both  
574 genes are regulated by chromatin epigenetic changes in *Arabidopsis* (Helliwell *et al.*, 2006;  
575 Kumar *et al.*, 2012; Madrid *et al.*, 2021), a very little explored field of research in *Coffea* sp. and  
576 crop perennials in general.

577

## 578 **The role of carbohydrates in coffee floral induction as a model for perennials**

579

580           Sugars have been shown to be important chemical signals that affect flowering, as  
581 strongly supported in model plants like *Arabidopsis* (Wahl *et al.*, 2013; Cho *et al.*, 2018;  
582 Fichtner *et al.*, 2021). Since no correlation was found between *CaFTI* expression and possible  
583 environment-related regulators, we examined sugar levels to assess their role as possible  
584 regulators in tropical perennial species. Gene expression analysis showed association with Total  
585 Soluble Sugar and Sucrose levels (**Fig. 3A and B**) in relation to temperatures during the five  
586 analyzed months, showing an association with warmer periods of the year (**Fig. 4A and S6-A**).  
587 This association is related to higher levels of TS and SC and coincided with *CaFTI* expression  
588 levels (**Fig. 2A**). As previously described by Cho *et al.* (2018) and, in accordance with our  
589 results (**Fig. 4**), sugar levels, a product of photosynthesis, can change according to seasons in

590 response to more hours of light and higher temperature.

591 Sugar variation is an important indicator of reproductive phase initiation, with evidence  
592 that it affects the expression of floral integrators, such as *FT* (Rolland *et al.*, 2006; Moghaddam  
593 and Van den Ende, 2013). In our study, sugar accumulation was higher in December and April,  
594 the summer period in Brazil that is hotter and has more hours of daylight (**Fig. S6-A**).  
595 Interestingly, these results coincide with two relevant periods associated with *CaFTI* expression  
596 - in December, before the increase in *CaFTI* expression in February, and in April which is a  
597 period before *CaFTI* expression peaks in June. Whether this pattern suggests that sugars act as a  
598 stimulus for *CaFTI* expression requires further evidence (**Fig. 1A**). Association of *CaFTI* with  
599 TS and sucrose levels suggest that its expression is responsive to carbohydrate signals, showing a  
600 possible connection between sugars and floral induction in perennial species. Thus, it will be  
601 interesting to determine whether energy status is a key regulator of *CaFTI* expression and  
602 controls coffee floral development, further suggesting that environmental factors are indirectly  
603 involved since photo-assimilate production is affected by photoperiod and temperature (Pego *et*  
604 *al.*, 2000; Lastdrager *et al.*, 2014). Accordingly, we demonstrate that sugar content in coffee  
605 plants changes in response to temperature regimens (de Oliveira *et al.*, 2020). These findings  
606 support previous studies demonstrating a correlation between *FT* expression pattern and  
607 carbohydrate content (Corbesier *et al.*, 1998).

608  
609

## CONCLUSIONS

610

611 Floral induction in perennial plants is a poorly understood process that integrates  
612 endogenous and environmental factors. Elucidating the molecular components of this floral  
613 regulatory process is a necessity in the face of imminent climate change to secure food  
614 production (Howden *et al.*, 2007; Lobell *et al.*, 2011; Zhao *et al.*, 2017). In this work we  
615 identified the coffee *FT* ortholog and determined its expression profile to describe the precise  
616 and potential floral induction window. This analysis includes the analysis of key *FT* regulators  
617 responsive to environmental signals, evaluation of climatic parameters and sugar content over  
618 the period of one year. Together, our results indicate a continuum of florigen transcription,  
619 conserved between contrasting coffee genotypes, that could underlie asynchronous floral  
620 development and flowering. The environment-related floral regulators, *CaCO*, *CaFLC* and

621 *CaPIF4*, were not co-expressed as expected with *CaFTI*, whereas a correlation was found with  
622 sugar content, which is affected by environmental changes over the course of a year. This  
623 suggests that *CaFTI* is not directly regulated by these genes, but that there may be a connection  
624 between sugar metabolism and florigen function in coffee. Thus, the present work contributes to  
625 comprehending asynchronous flowering in tropical perennial plants and provides a basis for  
626 targeting molecular components in crop breeding programs.

627

## 628 **SUPPLEMENTARY DATA**

629

630 Table S1 shows all the primers used in this work; figures S1 to S4 show the phylogenetic  
631 analyses and amino acids alignments for the gene families *FT*, *CONSTANS*, *FLC* and *PIF4*;  
632 Figure S5 shows a photo panel of the plagiotropic branches with floral meristems at different  
633 stage of development comparing *C. arabica* cvs. Iapar 59 and Acauã and *C. canephora* cv.  
634 Conilon in three different timepoints; Figure S6 shows the variation of photoperiod, temperature,  
635 precipitation and relative humidity during the experiments at the experimental field of Federal  
636 University of Lavras (UFLA, MG/Brazil).

637

638

## 639 **ACKNOWLEDGEMENTS**

640

640 The authors thank the members of the Laboratory of Plant Molecular Physiology (LFMP,  
641 UFLA/Brazil) for structural support of the experiments; Prof. Dr. Mario Lucio (UFLA/Brazil)  
642 and Instituto Brasileiro de Ciência e Tecnologia do *Café* (INCT-Café) to support plant material  
643 and field experiments; Fundação de Amparo à Pesquisa do Estado de Minas Gerais (FAPEMIG,  
644 grant number CAP APQ 03605/17), Conselho Nacional de Desenvolvimento Científico e  
645 Tecnológico and INCT-Café for the financial support; Prof. Dr. Paulo Eduardo R. Marchiori and  
646 colleagues from his lab (UFLA/Brazil) for the support on sugars and proteins analyses. Research  
647 in JCs lab is supported by a Natural Sciences and Engineering Research Council Discovery  
648 grant. Mike Mucci and Leane Illman from the Phytotron facility at the University of Guelph  
649 provided expert plant care.

650

## 651 **AUTHORS' CONTRIBUTIONS**

652

653 C.H.C., R.R.O. and A.C-J. conceptualized the project. C.H.C., conducted all experiments and  
654 data analyses. L.P.P. participated in the collection of plant materials, RNA extractions and the  
655 RT-qPCR execution. V.L. and C.F. participated in the yeast two hybrid and heterologous  
656 expression analyses. T.H.C.R. assisted bioinformatic and statistical analyses. R.R.O., J.C. and  
657 A.C-J. conceived of and supervised the experiments and data analyses. C.H.C. wrote the  
658 manuscript. R.R.O., J.C and A.C-J revised the manuscript and contributed to writing.  
659

660

### 661 **CONFLICT OF INTEREST**

662

The authors declare that there is no conflict of interest.

663

### 664 **FUNDING**

665 Coordenação de Aperfeiçoamento de Pessoal de Nível Superior (CAPES), Conselho Nacional de  
666 Desenvolvimento Científico e Tecnológico (CNPq). The LFMP was partially supported by the  
667 Instituto Brasileiro de Ciência e Tecnologia do Café (INCT/Café), FAPEMIG grant (CAG APQ  
668 03605/17). Research in JCs lab is funded by a Natural Sciences and Engineering Research  
669 Council of Canada (NSERC Discovery) grant.

670

### 671 **DATA AVAILABILITY**

672

Main data supporting the findings of this study are available within the paper and within its  
673 supplementary materials published online. The raw data used for analyses and figures are  
674 available from the corresponding author, Antonio Chalfun-Júnior, upon request.

675

### 676 **REFERENCES**

677

678 Abe M, Kobayashi Y, Yamamoto S, Daimon Y, Yamaguchi A, Ikeda Y, Ichinoki H, Notaguchi  
679 M, Goto K, Araki T. 2005. FD, a bZIP protein mediating signals from the floral pathway  
680 integrator FT at the shoot apex. *Science* 309, 1052–1056.

681

Ahn JH, Miller D, Winter VJ, Banfield MJ, Jeong HL, So YY, Henz SR, Brady RL, Weigel D.  
2006. A divergent external loop confers antagonistic activity on floral regulators FT and

- 682 TFL1. *EMBO Journal* 25, 605–614.
- 683 Aikawa S, Kobayashi MJ, Satake A, Shimizu KK, Kudoh H. 2010. Robust control of the  
684 seasonal expression of the Arabidopsis FLC gene in a fluctuating environment. *Proceedings*  
685 *of the National Academy of Sciences* 107, 11632–11637.
- 686 Albani MC, Coupland G. 2010. Comparative analysis of flowering in annual and perennial  
687 plants. *Current Topics in Developmental Biology*. Academic Press Inc., 323–348.
- 688 Amasino R. 2009. Floral induction and monocarpic versus polycarpic life histories. *Genome*  
689 *biology* 10, 228.
- 690 Amasino R. 2010. Seasonal and developmental timing of flowering. *Plant Journal* 61, 1001–  
691 1013.
- 692 Andrés F, Coupland G. 2012. The genetic basis of flowering responses to seasonal cues. *Nature*  
693 *reviews* 13, 627–639.
- 694 Barreto HG, Lazzari F, Aparecida Sággio S, Chalfun-Junior A, Vilela Paiva L, Augusto Benedito  
695 V. 2012. In Silico and Quantitative Analyses of the Putative FLC-like Homologue in Coffee  
696 (*Coffea arabica* L.). *Plant Molecular Biology*, 30:29–35.
- 697 Bates D, Mächler M, Bolker BM, Walker SC. 2015. Fitting linear mixed-effects models using  
698 lme4. *Journal of Statistical Software*, 67:1–48.
- 699 Bertrand, B., Bardil, A., Baraille, H., Dussert, S., Doulebeau, S., Dubois, E., *et al.* 2015. The  
700 Greater Phenotypic Homeostasis of the Allopolyploid *Coffea arabica* Improved the  
701 Transcriptional Homeostasis Over that of Both Diploid Parents. *Plant Cell Physiol.* 56 (10),  
702 2035–2051.
- 703 Böhlenius H, Huang T, Charbonnel-Campaa L, Brunner A, Jansson S, Strauss S, Nilsson O.  
704 2006. CO/FT regulatory module controls timing of flowering and seasonal growth cessation  
705 in trees. *Science* 312, 1038–1040.
- 706 Bradley D, Ratcliffe O, Vincent C, Carpenter R, Coen E. 1997. Inflorescence commitment and  
707 architecture in Arabidopsis. *Science* 275, 80–83.
- 708 Bustin SA, Benes V, Garson JA, *et al.* 2009. The MIQE Guidelines: Minimum Information for  
709 Publication of Quantitative Real-Time PCR Experiments. *Clinical Chemistry* 55, 611–622.
- 710 Camargo AP, Camargo MBP. 2001. Definição e esquematização das fases fenológicas do  
711 cafeeiro arábica nas condições tropicais do Brasil. *Bragantina* 60, 65–58.
- 712 Cao K, Cui L, Zhou X, Ye L, Zou Z, Deng S. 2016. Four tomato FLOWERING LOCUS T-like

- 713 proteins act Antagonistically to regulate floral initiation. *Frontiers in Plant Science* 6, 1213.
- 714 Carvalho CHS. 2008. *Cultivares de café: origem, características e recomendações*. Editora  
715 EMBRAPA Café, 334.
- 716 Chien CT, Bartel PL, Sternglanz R, Fields S. 1991. The two-hybrid system: a method to identify  
717 and clone genes for proteins that interact with a protein of interest. *Proceedings of the*  
718 *National Academy of Sciences* 88, 9578–9582.
- 719 Cho LH, Pasriga R, Yoon J, Jeon JS, An G. 2018. Roles of Sugars in Controlling Flowering  
720 Time. *Journal of Plant Biology* 61, 121–130.
- 721 Clough SJ, Bent AF. 1998. Floral dip: A simplified method for *Agrobacterium*-mediated  
722 transformation of *Arabidopsis thaliana*. *Plant Journal* 16, 735–743.
- 723 Coelho CP, Minow MAA, Chalfun-Júnior A, Colasanti J. 2014. Putative sugarcane FT/TFL1  
724 genes delay flowering time and alter reproductive architecture in *Arabidopsis*. *Frontiers in*  
725 *Plant Science* 5, 221.
- 726 Coneva V, Guevara D, Rothstein S, Colasanti J. 2012. Transcript and metabolite signature of  
727 maize source leaves suggests a link between transitory starch to sucrose balance and the  
728 autonomous floral transition. *Journal of Experimental Botany* 63, 5079–5092.
- 729 Coneva V, Zhu T, Colasanti J. 2007. Expression differences between normal and indeterminate1  
730 maize suggest downstream targets of ID1, a floral transition regulator in maize. *Journal of*  
731 *Experimental Botany* 58, 3679–3693.
- 732 Corbesier L, Lejeune P, Bernier G. 1998. The role of carbohydrates in the induction of flowering  
733 in *Arabidopsis thaliana*: Comparison between the wild type and a starchless mutant. *Planta*  
734 206, 131–137.
- 735 Corbesier L, Vincent C, Jang S, Fornara F, Fan Q, Searle I, Giakountis A, Farrona S, Gissot L,  
736 Turnbull C, Coupland G. 2007. FT protein movement contributes to long-distance signaling  
737 in floral induction of *Arabidopsis*. *Science*, 316(5827):1030-3.
- 738 Crisosto CH, Grantz DA, Meinzer FC. 1992. Effects of water deficit on flower opening in coffee  
739 (*Coffea arabica* L.). *Tree Physiol.*, 10(2):127-39.
- 740 DaMatta F and Ramalho JDC. 2006. Impacts of drought and temperature stress on coffee  
741 physiology and production: a review. *Brazilian Journal of Plant Physiology* 18, 55–81.
- 742 DaMatta F, Ronchi C, Maestri M, Barros R. 2007. Ecophysiology of coffee growth and  
743 production. *Brazilian journal of plant physiology* 19(4).



- 744 Deng W, Ying H, Helliwell CA, Taylor JM, Peacock WJ, Dennis ES. 2011. FLOWERING  
745 LOCUS C (FLC) regulates development pathways throughout the life cycle of Arabidopsis.  
746 Proc. Natl. Acad. Sci. USA, 108(16):6680-5.
- 747 Denoeud F, Carretero-Paulet L, Dereeper A, *et al.* 2014. The Coffee Genome Provides Insight  
748 into the Convergent Evolution of Caffeine Biosynthesis. Science 345, 1181–1184.
- 749 Dische. Z. 1962. General color reactions. In: Whistler RL, Wolfram ML (eds) Carbohydrate  
750 chemistry. Academic, New York, pp 477–520.
- 751 Fichtner F, Barbier FF, Annunziata MG, Feil R, Olas JJ, Mueller-Roeber B, Stitt M, Beveridge  
752 CA, Lunn JE. 2021. Regulation of shoot branching in arabidopsis by trehalose 6-phosphate.  
753 New Phytologist 229, 2135–2151.
- 754 Gao X, Walworth AE, Mackie C, Song GQ. 2016. Overexpression of blueberry FLOWERING  
755 LOCUS T is associated with changes in the expression of phytohormone-related genes in  
756 blueberry plants. Hortic Res.,3:16053.
- 757 Hanzawa Y, Money T, Bradley D. 2005. A single amino acid converts a repressor to an activator  
758 of flowering. PNAS 102, 7748–7753.
- 759 He Y, Chen T, Zeng X. 2020. Genetic and Epigenetic Understanding of the Seasonal Timing of  
760 Flowering. Plant Communications 1, 100008.
- 761 Helliwell CA, Wood CC, Robertson M, Peacock WJ, Dennis ES. 2006. The Arabidopsis FLC  
762 protein interacts directly in vivo with SOC1 and FT chromatin and is part of a  
763 high-molecular-weight protein complex. Wiley Online Library 46, 183–192.
- 764 Howden SM, Soussana J-F, Tubiello FN, Chhetri N, Dunlop M, Meinke H. 2007. Adapting  
765 agriculture to climate change. Proceedings of the National Academy of Sciences 104,  
766 19691–19696.
- 767 ICO. 2021. International Coffee Organization - Trade Statistics Tables.  
768 [https://www.ico.org/trade\\_statistics.asp?section=Statistics/](https://www.ico.org/trade_statistics.asp?section=Statistics/) accessed October 2021.
- 769 Jin S, Nasim Z, Susila H, Ahn JH. 2020. Evolution and functional diversification of  
770 FLOWERING LOCUS T/TERMINAL FLOWER 1 family genes in plants. Seminars in Cell  
771 and Developmental Biology 109, 20–30.
- 772 Johnson M, Zaretskaya I, Raytselis Y, Merezhuk Y, McGinnis S, Madden TL. 2008. NCBI  
773 BLAST: a better web interface. Nucleic Acids Research 36, W5–W9.
- 774 Jung JH, Lee HJ, Ryu JY, Park CM. 2016. SPL3/4/5 Integrate Developmental Aging

775 and Photoperiodic Signals into the FT-FD Module in Arabidopsis Flowering. *Molecular*  
776 *Plant* 9, 1647–1659.

777 Kaneko-Suzuki M, Kurihara-Ishikawa R, Okushita-Terakawa C, Kojima C, Nagano-Fujiwara M,  
778 Ohki I, Tsuji H, Shimamoto K, Taoka KI. 2018. TFL1-Like Proteins in Rice Antagonize  
779 Rice FT-Like Protein in Inflorescence Development by Competition for Complex Formation  
780 with 14-3-3 and FD. *Plant and Cell Physiology* 59, 458–468.

781 Karlgren A, Gyllenstrand N, Källman T, Sundström JF, Moore D, Lascoux M, Lagercrantz U.  
782 2011. Evolution of the PEBP gene family in plants: Functional diversification in seed plant  
783 evolution. *Plant Physiology* 156, 1967–1977.

784 Kim D-H, Doyle MR, Sung S, Amasino RM. 2009. Vernalization: Winter and the Timing of  
785 Flowering in Plants. *Annual Review of Cell and Developmental Biology* 25, 277–299.

786 Klocko AL, Ma C, Robertson S, Esfandiari E, Nilsson O, Strauss SH. 2016. FT overexpression  
787 induces precocious flowering and normal reproductive development in Eucalyptus. *Plant*  
788 *Biotechnology Journal* 14, 808–819.

789 Kotoda N, Hayashi H, Suzuki M, Igarashi M, Hatsuyama Y, Kidou S, Igasaki T, Nishiguchi M,  
790 Yano K, Shimizu T, Takahashi S, Iwanami H, Moriya S, Abe K. 2010. Molecular  
791 characterization of FLOWERING LOCUS T-like genes of apple (*Malus x domestica*  
792 Borkh.). *Plant Cell Physiol.*, 51(4):561-75.

793 Kumar S, Lucyshyn D, Jaeger K, Alós E, Alvey E, Harberd N, Wigge P. 2012. Transcription  
794 factor PIF4 controls the thermosensory activation of flowering. *Nature* 484, 242–245.

795 Kumar S, Stecher G, Li M, Knyaz C, Tamura K. 2018. MEGA X: molecular evolutionary  
796 genetics analysis across computing platforms. *Molecular biology and evolution* 35, 1547–  
797 1549.

798 Lamesch P, Berardini TZ, Li D, *et al.* 2012. The Arabidopsis Information Resource (TAIR):  
799 Improved gene annotation and new tools. *Nucleic Acids Research* 40, D1202-10.

800 Larkin MA, Blackshields G, Brown NP, *et al.* 2007. Clustal W and Clustal X version 2.0.  
801 *Bioinformatics* 23, 2947–2948.

802 Lastdrager J, Hanson J, Smeekens S. 2014. Sugar signals and the control of plant growth and  
803 development. *Journal of Experimental Botany* 65, 799–807.

804 Laurie RE, Diwadkar P, Jaudal M, Zhang L, Hecht V, Wen J, Tadege M, Mysore KS, Putterill J,  
805 Weller JL, Macknight RC. 2011. The Medicago FLOWERING LOCUS T homolog,

- 806 MtFTa1, is a key regulator of flowering time. *Plant Physiol.*, 156(4):2207-24.
- 807 Lemoine R. 2000. Sucrose transporters in plants: update on function and structure. *Biochimica et*  
808 *Biophysica Acta (BBA) - Biomembranes* 1465, 246–262.
- 809 Liu L, Adrian J, Pankin A, Hu J, Dong X, Korff M, Turck F. 2014. Induced and natural variation  
810 of promoter length modulates the photoperiodic response of FLOWERING LOCUS T.  
811 *Nature Communications* 5, 4558.
- 812 Lobell DB, Schlenker W, Costa-Roberts J. 2011. Climate trends and global crop production  
813 since 1980. *Science* 333, 616–620.
- 814 Lopez *et al*, 2021. An overview of the endogenous and environmental factors related to the  
815 Coffee arabica flowering process. *Beverage Plant Research*, in press.
- 816 Madrid E, Chandler J, Coupland G. 2021. Gene regulatory networks controlled by  
817 FLOWERING LOCUS C that confer variation in seasonal flowering and life history.  
818 *Journal of Experimental Botany* 72, 4–14.
- 819 Majerowicz N, Söndahl MR. 2005. Induction and differentiation of reproductive buds in *Coffea*  
820 *arabica* L. *Brazilian Journal of Plant Physiology* 17, 247–254.
- 821 Martins M, Fortunato A, Rodrigues W, Partelli FL, Campostrini E, Lidon F, DaMatta F,  
822 Ramalho J, Ribeiro-Barros A. 2017. Selection and validation of reference genes for accurate  
823 RT-qPCR data normalization in *Coffea* spp. under a climate changes context of interacting  
824 elevated [CO<sub>2</sub>] and temperature. *Frontiers in Plant Science* 8, 307.
- 825 McGarry RC, Ayre BG. 2012. Manipulating plant architecture with members of the CETS gene  
826 family. *Plant Science* 188–189, 71–81.
- 827 Meireles da Silva D, Brandão IR, Alves JD, de Santos MO, de Souza KRD, de Silveira HRO.  
828 2014. Physiological and biochemical impacts of magnesium-deficiency in two cultivars of  
829 coffee. *Plant and Soil* 2014 382:1 382, 133–150.
- 830 Michaels S, Amasino R. 1999. FLOWERING LOCUS C Encodes a Novel MADS Domain  
831 Protein That Acts as a Repressor of Flowering. *The Plant Cell* 11, 949–956.
- 832 Michaels SD, Himelblau E, Kim SY, Schomburg FM, Amasino RM. 2005. Integration of  
833 Flowering Signals in Winter-Annual *Arabidopsis* 1. *Plant Physiology* 137, 149–156.
- 834 Miller GL. 1959. Use of Dinitrosalicylic Acid Reagent for Determination of Reducing Sugar.  
835 *Analytical Chemistry* 31, 426–428.
- 836 Minow MAA, Ávila LM, Turner K, Ponzoni E, Mascheretti I, Dussault FM, Lukens L, Rossi V,

- 837 Colasanti J. 2018. Distinct gene networks modulate floral induction of autonomous maize  
838 and photoperiod-dependent teosinte. *Journal of Experimental Botany* 69, 2937–2952.
- 839 Moghaddam MRB, Van den Ende W. 2013. Sugars, the clock and transition to flowering.  
840 *Frontiers in Plant Science* 4, 22.
- 841 Morais H, Caramori PH, Koguishi MS *et al.* 2008. Escala fenológica detalhada da fase  
842 reprodutiva de *Coffea arabica*. *Bragantia* 67(1):257–260.
- 843 Nakamura Y, Lin Y, Watanabe S, Liu Y, Katsuyama K, Kanehara K, Inaba K. 2019. High-  
844 Resolution Crystal Structure of Arabidopsis FLOWERING LOCUS T Illuminates Its  
845 Phospholipid-Binding Site in Flowering. *iScience* 21, 577–586.
- 846 Nasim Z, Fahim M, Ahn JH. 2017. Possible Role of MADS AFFECTING FLOWERING 3 and  
847 B-BOX DOMAIN PROTEIN 19 in Flowering Time Regulation of Arabidopsis Mutants  
848 with Defects in Nonsense-Mediated mRNA Decay. *Frontiers in Plant Science* 8, 191.
- 849 Nicholas K, Nicholas H. 1997. GENEDOC. A tool for editing and annotating multiple sequence  
850 alignments.
- 851 Ohto M-A, Onai K, Furukawa Y, Aoki E, Araki T, Nakamura K. 2001. Effects of Sugar on  
852 Vegetative Development and Floral Transition in Arabidopsis 1. *Plant Physiology* 127, 252–  
853 261.
- 854 de Oliveira RR, Cesarino I, Mazzafera P, Dornelas MC. 2014. Flower development in *Coffea*  
855 *arabica* L.: New insights into MADS-box genes. *Plant Reproduction* 27, 79–94.
- 856 de Oliveira RR, Chalfun-Junior A, Vilela Paiva L, Carvalho Andrade A. 2010. In Silico and  
857 Quantitative Analyses of MADS-Box Genes in *Coffea arabica*. *Plant Molecular Biology -*  
858 *Springer* 28, 460–472.
- 859 de Oliveira RR, Ribeiro THC, Cardon CH, Fedenia L, Maia VA, Barbosa BCF, Caldeira CF,  
860 Klein PE, Chalfun-Junior A. 2020. Elevated Temperatures Impose Transcriptional  
861 Constraints and Elicit Intraspecific Differences Between Coffee Genotypes. *Frontiers in*  
862 *Plant Science* 11, 1113.
- 863 Pego J V., Kortstee AJ, Huijser C, Smeekens SCM. 2000. Photosynthesis, sugars and the  
864 regulation of gene expression. *Journal of Experimental Botany* 51, 407–416.
- 865 Pin PA, Nilsson O. 2012. The multifaceted roles of FLOWERING LOCUS T in plant  
866 development. *Plant, Cell & Environment* 35, 1742–1755.
- 867 Ribas AF, Dechamp E, Champion A, Bertrand B, Combes MC, Verdeil JL, Lapeyre F,

- 868 Lashermes P, Etienne H. 2011. Agrobacterium-mediated genetic transformation of *Coffea*  
869 *arabica* (L.) is greatly enhanced by using established embryogenic callus cultures. *BMC*  
870 *Plant Biol.*, 11:92.
- 871 Rolland F, Baena-Gonzalez E, Sheen J. 2006. SUGAR SENSING AND SIGNALING IN  
872 PLANTS: Conserved and Novel Mechanisms. *Annual Review of Plant Biology* 57, 675–  
873 709.
- 874 Sheen J. 2014. Master regulators in plant glucose signaling networks. *Journal of Plant Biology*  
875 57, 67–79.
- 876 Smith A, Stitt M. 2007. Coordination of carbon supply and plant growth. *Plant, cell &*  
877 *environment* 30, 1126–1149.
- 878 Song YH, Shim JS, Kinmonth-Schultz HA, Imaizumi T. 2008. Photoperiodic Flowering: Time  
879 Measurement Mechanisms in Leaves. *Annual Review of Plant Biology* 66, 441–464.
- 880 Steibel JP, Poletto R, Coussens PM, Rosa GJM. 2009. A powerful and flexible linear mixed  
881 model framework for the analysis of relative quantification RT-PCR data. *Genomics* 94,  
882 146–152.
- 883 Štorchová H, Hubáčková H, Abeyawardana OAJ, Walterová J, Vondráková Z, Eliášová K,  
884 Mandák B. 2019. *Chenopodium ficifolium* flowers under long days without upregulation of  
885 FLOWERING LOCUS T (FT) homologs. *Planta* 250, 2111–2125.
- 886 Suárez-López P, Wheatley K, Robson F, Onouchi H, Valverde F, Coupland G. 2001.  
887 CONSTANS mediates between the circadian clock and the control of flowering in  
888 *Arabidopsis*. *nature* 410, 1116–1120.
- 889 Teketay D. 1999. History, Botany and Ecological Requirements of Coffee. *Walia*, 20: 28-50.
- 890 Tsuji H. 2017. Molecular function of florigen. *Breeding Science* 67, 327–332.
- 891 Tränkner C, Lehmann S, Hoenicka H, Hanke MV, Fladung M, Lenhardt D, Dunemann F, Gau  
892 A, Schlangen K, Malnoy M, Flachowsky H. 2010. Over-expression of an FT-homologous  
893 gene of apple induces early flowering in annual and perennial plants. *Planta*, 232(6):1309-  
894 24.
- 895 Turck F, Fornara F, Coupland G. 2008. Regulation and Identity of Florigen: FLOWERING  
896 LOCUS T Moves Center Stage. *Annual Review of Plant Biology* 59, 573–594.
- 897 Valverde F, Mouradov A, Soppe W, Ravenscroft D, Smach A, Coupland G. 2004. Photoreceptor  
898 regulation of CONSTANS protein in photoperiodic flowering. *Science* 303, 1003–1006.

- 899 Vieira HD. 2008. Coffee: The plant and its cultivation. Plant-Parasitic Nematodes of Coffee.  
900 Springer Netherlands, 3–18.
- 901 Wahl V, Ponnu J, Schlereth A, Arrivault S, Langenecker T, Franke A, Feil R, Lunn JE, Stitt M,  
902 Schmid M. 2013. Regulation of flowering by trehalose-6-phosphate signaling in *Arabidopsis*  
903 *thaliana*. *Science* 339, 704–707.
- 904 Wang R, Farrona S, Vincent C, Joecker A, Schoof H, Turck F, Alonso-Blanco C, Coupland G,  
905 Albani M. 2009. PEP1 regulates perennial flowering in *Arabis alpina*. *Nature* 459, 423–427.
- 906 Wenkel S, Turck F, Singer K, Gissot L, Le Gourrierec J, Samach A, Coupland G. 2006.  
907 CONSTANS and the CCAAT box binding complex share a functionally important domain  
908 and interact to regulate flowering of *Arabidopsis*. *Plant Cell* 18, 2971–2984.
- 909 Wickland D, Hanzawa Y. 2015. The FLOWERING LOCUS T/TERMINAL FLOWER 1 gene  
910 family: functional evolution and molecular mechanisms. *Molecular Plant* 8, 983–997.
- 911 Wigge PA, Kim MC, Jaeger KE, Busch W, Schmid M, Lohmann JU, Weigel D. 2005.  
912 Integration of spatial and temporal information during floral induction in *Arabidopsis*.  
913 *Science* 309, 1056–1059.
- 914 Wolabu TW, Zhang F, Niu L, Kalve S, Bhatnagar-Mathur P, Muszynski MG, Tadege M. 2016.  
915 Three FLOWERING LOCUS T-like genes function as potential florigens and mediate  
916 photoperiod response in sorghum. *New Phytologist* 210, 946–959.
- 917 Wormer BYTM, Gituanja J. 1970. FLORAL INITIATION AND FLOWERING OF COFFEA  
918 ARABICA L. IN KENYA. *Experimental Agriculture* 6, 157–170.
- 919 Yoo S, Chen C, Rojas M, Daimon Y, Ham B, Araki T, Lucas W. 2013. Phloem long-distance  
920 delivery of FLOWERING LOCUS T (FT) to the apex. *The Plant Journal* 75, 456–468.
- 921 Zhao C, Liu B, Piao S, *et al.* 2017. Temperature increase reduces global yields of major crops in  
922 four independent estimates. *Proceedings of the National Academy of Sciences* 114, 9326–  
923 9331.
- 924 Zhu Y, Klasfeld S, Wagner D. 2021. Molecular regulation of plant developmental transitions and  
925 plant architecture via PEPB family proteins: an update on mechanism of action. *J Exp Bot.*,  
926 72(7):2301-2311.
- 927 Zuo Z, Liu H, Liu B, Liu X, Lin C. 2011. Blue light-dependent interaction of CRY2 with SPA1  
928 regulates COP1 activity and floral initiation in *Arabidopsis*. *Current Biology* 21, 841–847.
- 929

930

## FIGURE LEGENDS

931

932 **Figure 1 – Functional analysis of *CaFTI*.** A – Heterologous overexpression of *CaFTI* in  
933 *Arabidopsis thaliana* Ler ecotype causes early flowering. From left to right: Wild-type (*Ler*-  
934 WT); 35S::*CaFTI* construct in *Ler*-WT background; *FT* loss-of-function (*Ler-ft*); 35S::*CaFTI*  
935 construction with *Ler-ft* background. The overexpression of *CaFTI* driven by 35S CaMV was  
936 analyzed in 9 independent lines from 24 in T2 both *Ler* wild type (*Ler*-WT) plants as well as *ft*  
937 mutants. **B** – Rosette leaf number compared between *Ler*-WT / 35S::*CaFTI*, *Ler-ft* /  
938 35S::*CaFTI*, *Ler*-WT, and *Ler-ft*. **C** - Yeast Two Hybrid Protein-protein interaction assay: Yeast  
939 transformed with Empty plasmid, *AtFD*, and *At14-3-3* inserted into pGADT7-RecAB plasmid  
940 (Prey), against *CaFTI* inserted into pBridge plasmid (Bait). Transformed yeast grown in SD  
941 medium as negative control and SD/-LTH/X- $\alpha$ -Gal as select medium and, as positive control  
942 *Arabidopsis* FT interacted with *Arabidopsis* FD in SD/-LTH/X- $\alpha$ -Gal select medium.

943

944 **Figure 2 - RT-qPCR expression analysis of putative floral regulators genes in leaves**  
945 **collected over one year from three different coffee genotypes: *C. arabica* cvs. Iapar 59 and**  
946 **Acauã and *C. canephora* cv. Conilon.** Expression analysis were performed for the genes  
947 previously characterized (Fig. 1 and S1 to S4), *CaFTI* (A), *CaCO* (B), *CaFLC* (C) and *CaPIF4*  
948 (D). Leaf samples of different coffee genotypes were used. *C. arabica* cvs. IAPAR59 (black  
949 bars) and Acauã (white bars) and *C. canephora* cv. Conilon (gray bars). Samples collected at the  
950 first hours of the day (morning) and at the last hours of the day (Afternoon) in December of 2016  
951 (DEC) and February (FEB), April (APR), June (JUN) and October (OCT) of 2017. Relative  
952 expression differences were calculated as log<sub>2</sub> fold Change by Linear Mix Model as described  
953 by Steibel, *et al.* (2009). Letters at the top of the bars indicate the statistical differences, in which  
954 lower case letters represent comparisons between genotypes in each month, and capital letters  
955 compare the same genotype at different time points during the year.

956

957 **Figure 3 – Carbohydrate content quantification from coffee leaves in microgram per gram**  
958 **of fresh weight.** Samples collected from two *Coffea arabica* cultivars, Iapar 59 (red line), Acauã  
959 (blue line), and one *Coffea canephora* cultivar, Conilon (purple line), collected along five  
960 months of a year (DECEMBER, FEBRUARY, APRIL, JUNE, and OCTOBER). **A** – Total

961 soluble sugar; **B** – Sucrose; **C** – Reducing sugar; **D** – Starch. Each sampling data set is  
962 represented by a point in the line with the standard deviation. All cultivars in each timepoint  
963 were represented by 3 biological samples and two technical replications.

964

965

966 **Figure 4 – The floral induction window in coffee trees as a model for perennial species.**

967 Figure **A**, left axis of the graph represents the daylight hours variation divided by 24 hours which  
968 is separated in yellow color (day) and light blue color (night) in the graphic area. Right axis  
969 represents degree values (Celsius) from minimum (blue line), mean (purple line), and max (red  
970 line) temperature variation over the year; **B**, proposed floral induction window from February  
971 until October based on variation of *CaFTI* expression levels, total soluble sugars (TSS) and  
972 sucrose (SUC) content over the year. Gradients of color intensity (dark blue indicates higher  
973 level, light blue lower levels and white not detectable) represents the content level in terms of  
974 gene expression, total soluble sugar, and sucrose variation. The floral development stages  
975 observed in plants when the leaves were collected for the five time points (months) are also  
976 indicated in the figure; **C**, shows a plagiotropic branch with floral buds in the same development  
977 in both parts, the early formed branch (brown and lignified stem) and the late formed branch  
978 (green stem). Because the late formed branch originates from early nodes, the continuous  
979 vegetative activity of the shoot apical meristem (SAM) along the year (details in Figs. S5 e S6),  
980 in this figure suggests a need for extended florigen activity to induce axillary meristems  
981 formation at different times. Interestingly, floral meristems induced at different times reach  
982 flower buds at the same time.



**A**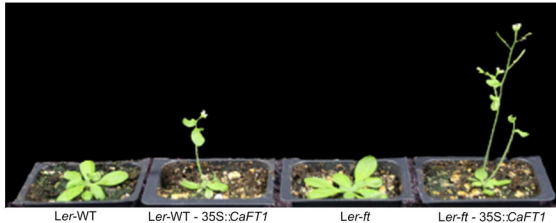**B**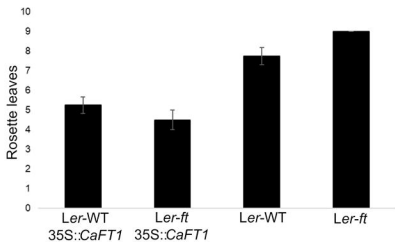**C**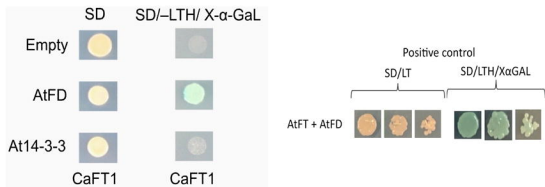

A

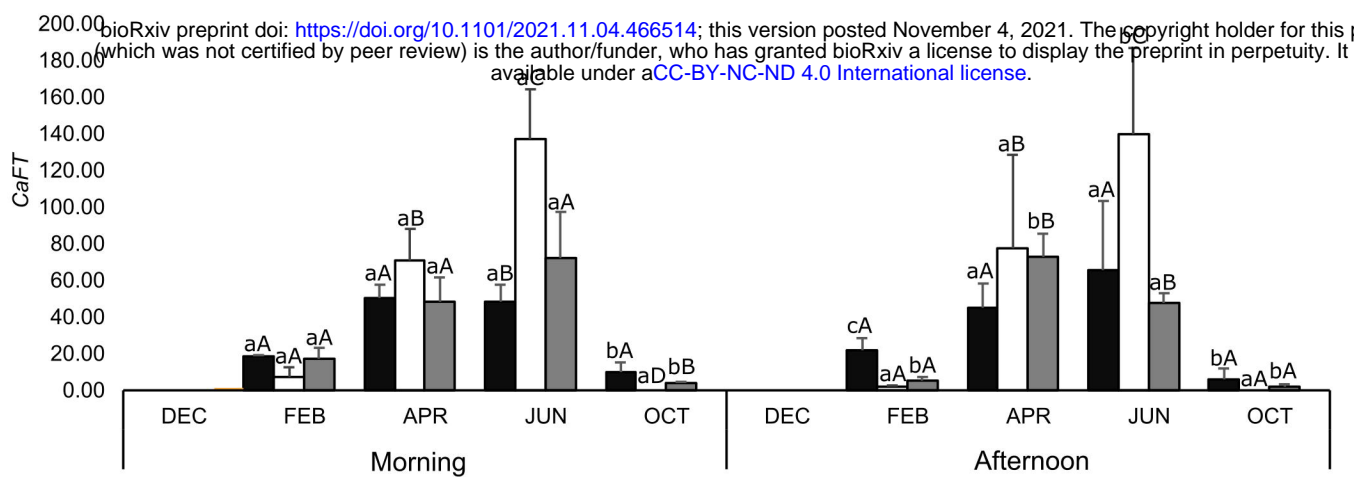

B

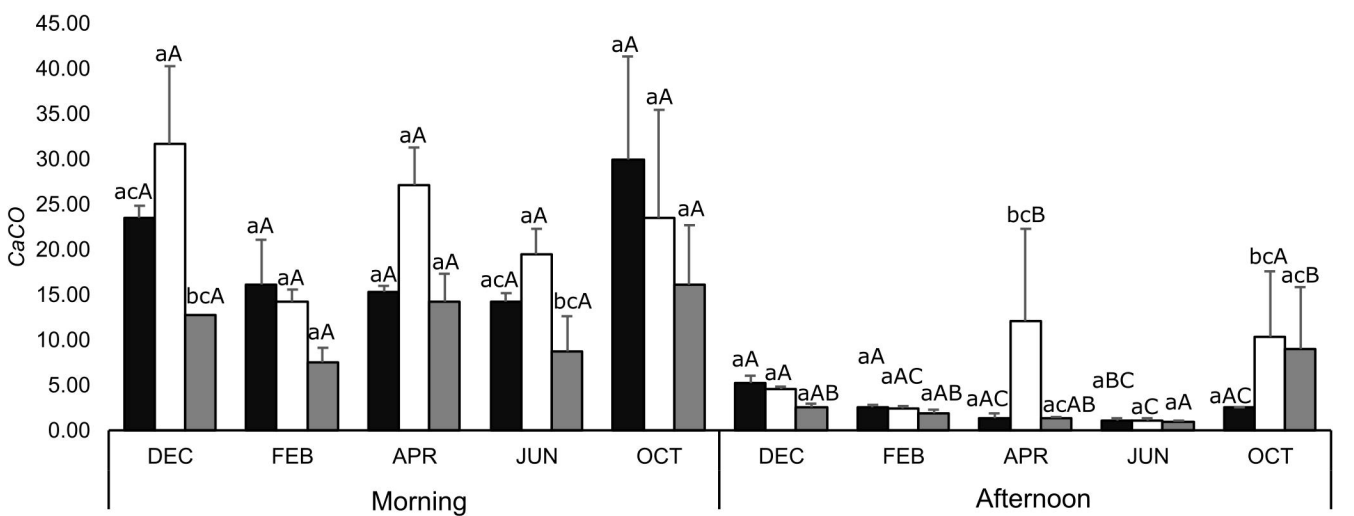

C

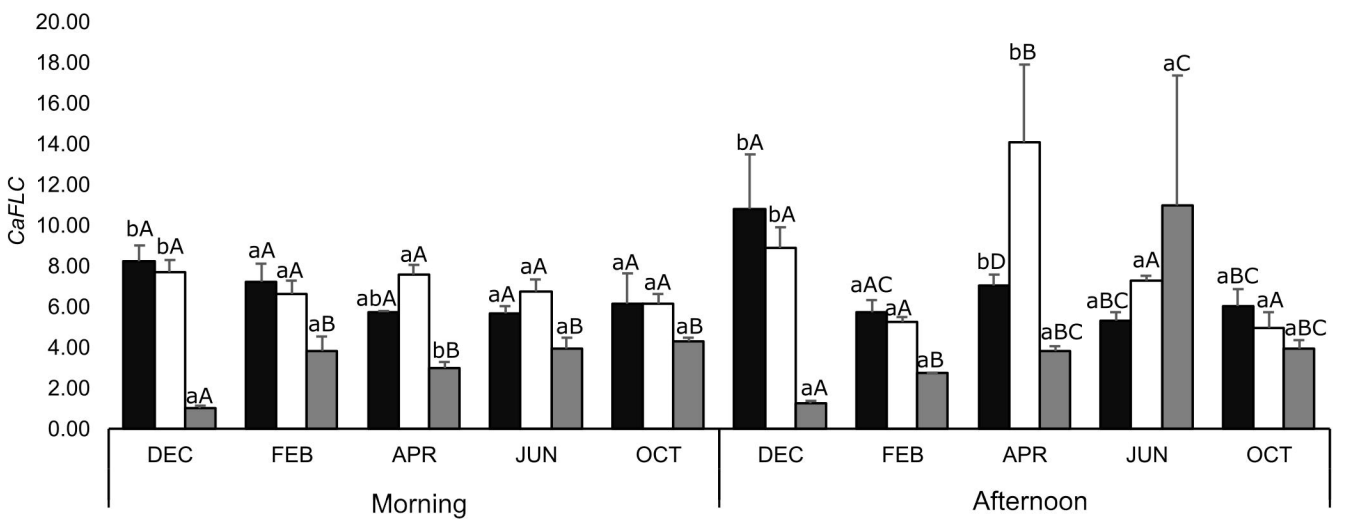

D

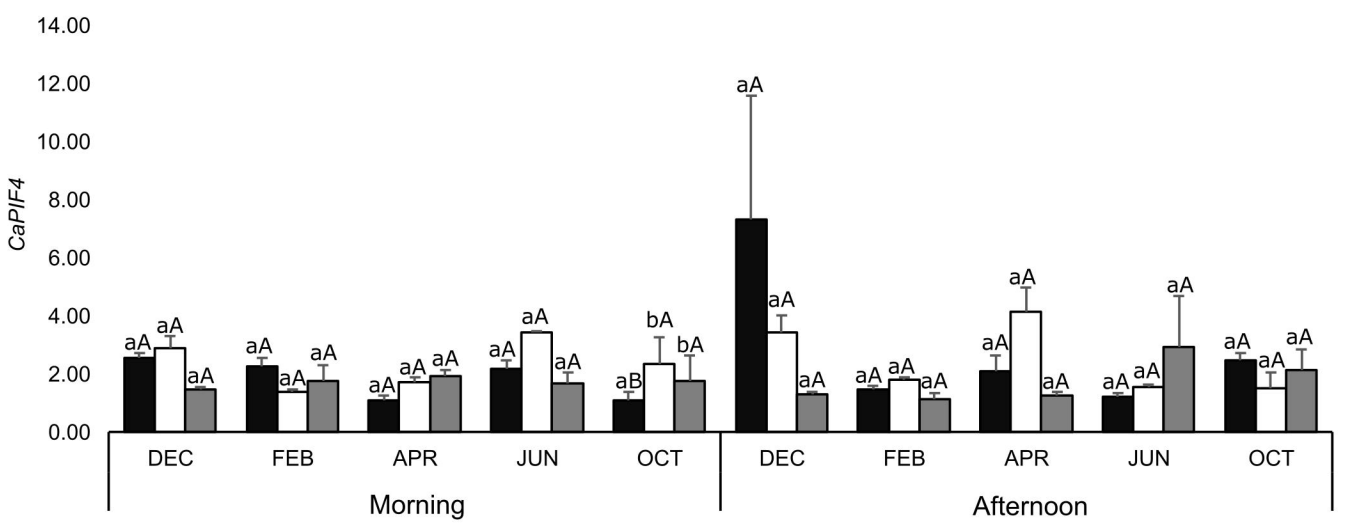

■ Iapar59   ■ Acauã   ■ Conilon

**A**

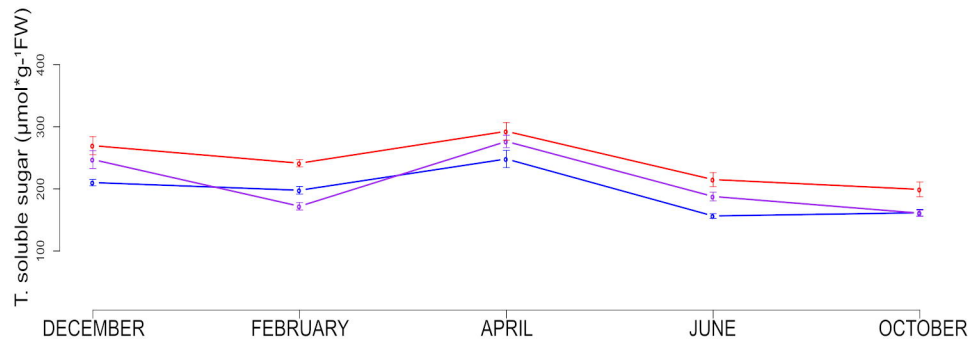

**B**

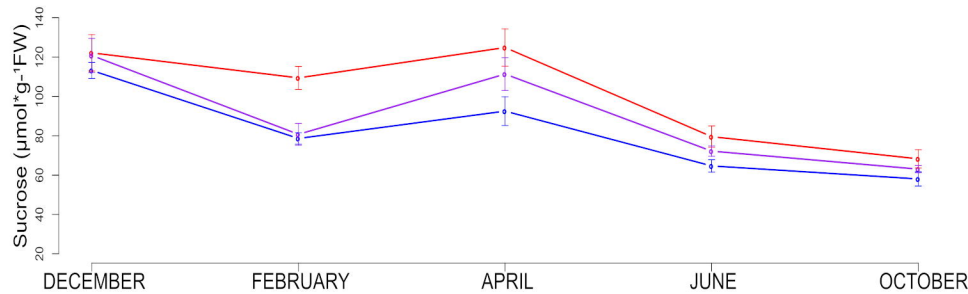

**C**

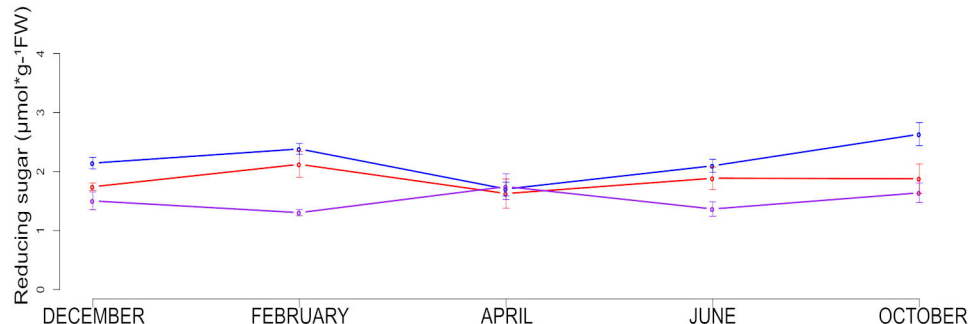

**D**

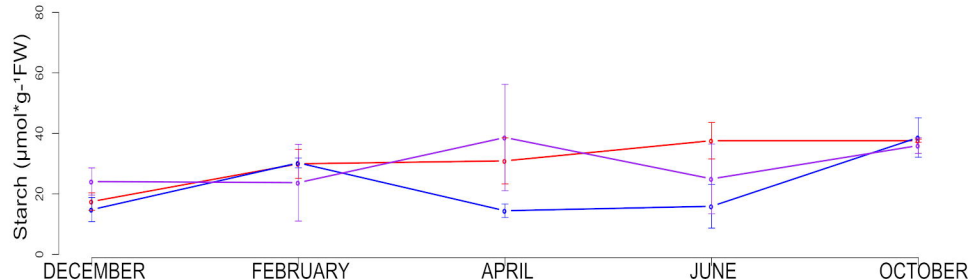

**A**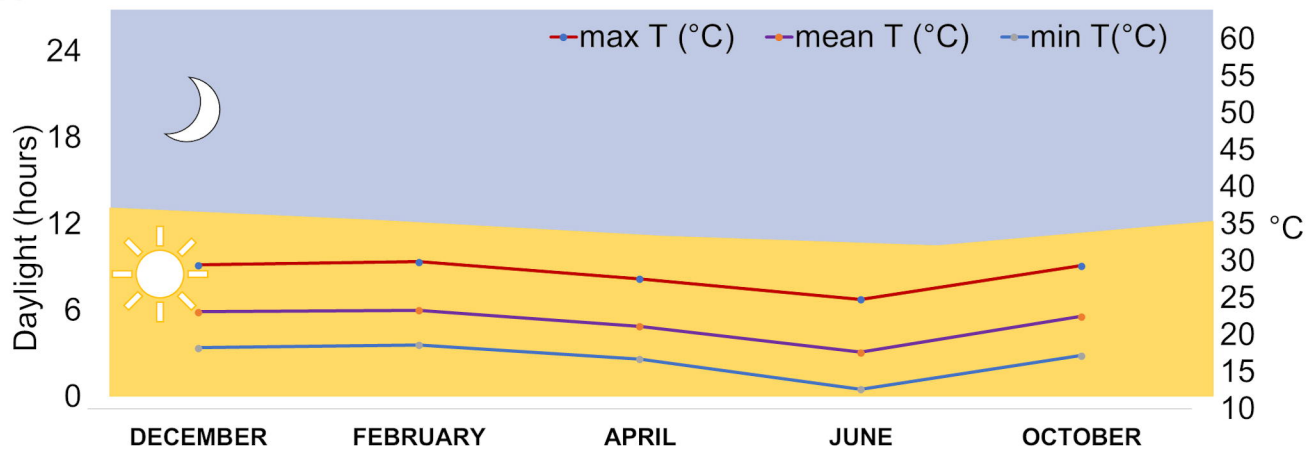**B**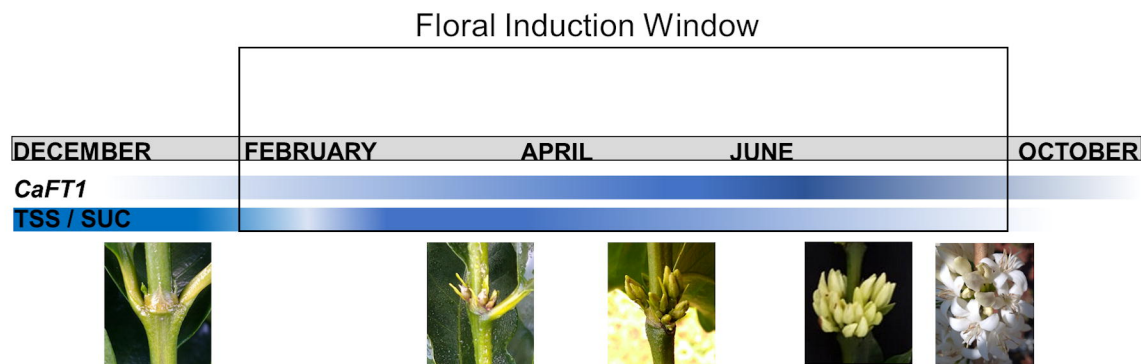**C**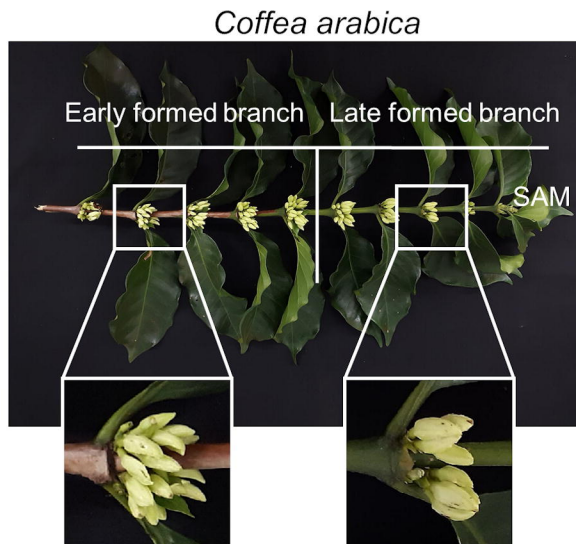

Source: https://www.biorxiv.org/content/biorxiv/early/2021/11/04/2021.11.04.466514.full.pdf
